# Supplementary material
Source: PubMed Central journal article supplement (PMC3675988)

**Supplemental Table 1 – *Aspergillus fumigatus* strains used in this study**

| <b>Strain</b>                                   | <b>Description</b>                                         | <b>Purpose</b>                                     | <b>Reference</b>                      |
|-------------------------------------------------|------------------------------------------------------------|----------------------------------------------------|---------------------------------------|
| <i>akuBKU80</i>                                 | <i>akuBKU80::pyrG</i> , in CEA17                           | Parental strain                                    | *Da Silva Ferreira <i>et al.</i> 2006 |
| <i>AfchoAΔ::HPH</i>                             | <i>akuBKU80::pyrG AfchoAΔ::HPH</i>                         | Deletion of <i>AfCHOA</i>                          | This study                            |
| <i>AfbadAΔ::HPH</i>                             | <i>akuBKU80::pyrG AfbadAΔ::HPH</i>                         | Deletion of <i>AfBADA</i>                          | This study                            |
| <i>AfchoAΔAfbadAΔ::HPH</i>                      | <i>akuBKU80::pyrG AfchoAΔAfbadAΔ::HPH</i>                  | Double deletion of <i>AfCHOA</i> and <i>AfBADA</i> | This study                            |
| <i>Dal::eGFP::promoter::RFP</i>                 | <i>Dal::eGFP::promoter::RFP</i>                            | Transcriptional fusion                             | This study                            |
| <i>AfchoAΔAfbadAΔ::AfCHOA-eGFP + AfBADA-RFP</i> | <i>AfchoAΔAfbadAΔ::eGFP::AfCHOA::promoter::AfBADA::RFP</i> | Revertant strain and translational fusion          | This study                            |

\*da Silva Ferreira ME, Kress MR, Savoldi M, Goldman MH, Hartl A, Heinekamp T, Brakhage AA, Goldman GH. 2006. The *akuB(KU80)* mutant deficient for nonhomologous end joining is a powerful tool for analyzing pathogenicity in *Aspergillus fumigatus*. *Eukaryot Cell* 5:207-211.

**Supplementary Table 2. Culture media and various stresses tested on the viability of mutants**

| rich complex media |                                                          |
|--------------------|----------------------------------------------------------|
| Sabouraud medium.  | 2% glucose<br>1% peptone<br>2 % agar<br>pH 5.6           |
| Malt medium        | 2 % malt extract<br>2 % agar                             |
| YPD medium         | 1% yeast extract<br>2% peptone<br>2% dextrose<br>2% agar |
| YE medium          | 1% yeast extract<br>2% agar                              |

| synthetic media            |                                                                                                                                                                                                    |
|----------------------------|----------------------------------------------------------------------------------------------------------------------------------------------------------------------------------------------------|
| RPMI medium                | see RPMI-1640 Media Formulation (sigma-aldrich)                                                                                                                                                    |
| Minimal medium (MM)        | 1 % glucose<br>0.92 g/L ammonium tartrate<br>0.5 g KCl, 0.5 g MgSO <sub>4</sub> , 7H <sub>2</sub> O and 2 g KH <sub>2</sub> PO <sub>4</sub><br>1 mL of trace element solution at pH 6.5<br>2% agar |
| MM w/o nitrogen            | 1 % glucose<br>0.5 g KCl, 0.5 g MgSO <sub>4</sub> , 7H <sub>2</sub> O and 2 g KH <sub>2</sub> PO <sub>4</sub><br>1 mL of trace element solution at pH 6.5<br>2% agar                               |
| MM w/o carbon              | 0.92 g/L ammonium tartrate<br>0.5 g KCl, 0.5 g MgSO <sub>4</sub> , 7H <sub>2</sub> O and 2 g KH <sub>2</sub> PO <sub>4</sub><br>1 mL of trace element solution at pH 6.5<br>2% agar                |
| MM w/o nitrogen and carbon | 0.5 g KCl, 0.5 g MgSO <sub>4</sub> , 7H <sub>2</sub> O and 2 g KH <sub>2</sub> PO <sub>4</sub><br>1 mL of trace element solution at pH 6.5<br>2% agar                                              |

| stresses tested on the viability of mutants |                                                                                                                                                        |
|---------------------------------------------|--------------------------------------------------------------------------------------------------------------------------------------------------------|
| osmotic stresses                            | solid MM (or solid rich medium) + 1 - 2.5 M NaCl<br>solid MM (or solid rich medium)+ 1.2 M Mannitol<br>solid MM (or solid rich medium)+ 1,2 M Sorbitol |
| oxidative stresses                          | solid MM (or solid rich medium) + 1 -5 mM H <sub>2</sub> O <sub>2</sub><br>solid MM (or solid rich medium) + 5 -80 μM ménadione                        |
| pH stresses                                 | solid MM at pH 2 (MES buffer)<br>solid MM at pH 9 (Tris buffer)                                                                                        |
| Thermic stresses                            | solid MM (or rich medium) at 4°C<br>solid MM (or rich medium) at 50°C                                                                                  |
| freezing shock                              | conidial viability after 24h at -20°C and growth on MM                                                                                                 |
| heat shock                                  | conidial viability after 5min at 75°C and growth on MM                                                                                                 |

**Supplemental Table 3. List of oligonucleotides using during this study.**

| Primers                           | Sequence (5'-3')                                              | Purpose in this study                               | PCR  |
|-----------------------------------|---------------------------------------------------------------|-----------------------------------------------------|------|
| 55- <i>CHOA</i>                   | CACAGCTACTCCTGAGTACGACTTCCTCCA                                | <i>AfCHOA</i> disruption cassette                   | PCR1 |
| 53- <i>CHOA</i>                   | CTCGTGAATCTTTTACCAGATCGGAAGCAATTCCAGCACCTCTGAAGATTGGTAAGTGAG  | <i>AfCHOA</i> disruption cassette                   | PCR1 |
| 5- <i>CHOA-HPH</i>                | CTCACTTACCAATCTTCAGAGGTGCTGGAATTGCTTCCGATCTGGTAAAAGATTACAGAG  | <i>AfCHOA</i> disruption cassette                   | PCR3 |
| 3- <i>CHOA-HPH</i>                | AATAAGCCAGCATCTGTACACAAGAAGCCAATCAGAGCAGATTGTACTGAGAGTGCACCA  | <i>AfCHOA</i> disruption cassette                   | PCR3 |
| 35- <i>CHOA</i>                   | TGGTGCACTCTCAGTACAATCTGCTCTGATTGGCTTCTGTGTACAGATGCTGGCTTATT   | <i>AfCHOA</i> disruption cassette                   | PCR2 |
| 33- <i>CHOA</i>                   | ATACCTCCAGTAAACCTCTGGGGTTGAGC                                 | <i>AfCHOA</i> disruption cassette                   | PCR2 |
| 55- <i>BADA</i>                   | CACAGCTTCATGTACAAGCACTTTTTCTCG                                | <i>AfBADA</i> disruption cassette                   |      |
| 53- <i>BADA</i>                   | TCGTGAATCTTTTACCAGATCGGAAGCAATTGAATGTGTACAACCTATCCGCCAAAGGAG  | <i>AfBADA</i> disruption cassette                   |      |
| 5- <i>BADA-HPH</i>                | CTCCTTTGGCGGATAAGTTGTACACATTCAATTGCTTCCGATCTGGTAAAAGATTACCGA  | <i>AfBADA</i> disruption cassette                   |      |
| 3- <i>BADA-HPH</i>                | TACCTCTTAGTACTCTGACCGACCTGCCATCAGAGCAGATTGTACTGAGAGTGCACCA    | <i>AfBADA</i> disruption cassette                   |      |
| 35- <i>BADA</i>                   | TGGTGCACTCTCAGTACAATCTGCTCTGATGGGCAGGTCGGTCAGAGTACTAGAGAGGTA  | <i>AfBADA</i> disruption cassette                   |      |
| 33- <i>BADA</i>                   | ATGGCTAATCCACCGCACCTAAGAGGTAAT                                | <i>AfBADA</i> disruption cassette                   |      |
| 55- <i>CHOABADA</i>               | CACAGCTTCATGTACAAGCACTTTTTCTCG                                | <i>AfCHOA</i> and <i>AfBADA</i> disruption cassette |      |
| 53- <i>CHOABADA</i>               | TCGTGAATCTTTTACCAGATCGGAAGCAATTGAATGTGTACAACCTATCCGCCAAAGGAG  | <i>AfCHOA</i> and <i>AfBADA</i> disruption cassette |      |
| 5- <i>CHOABADA-HPH</i>            | CTCCTTTGGCGGATAAGTTGTACACATTCAATTGCTTCCGATCTGGTAAAAGATTACCGA  | <i>AfCHOA</i> and <i>AfBADA</i> disruption cassette |      |
| 3- <i>CHOABADA-HPH</i>            | TTATGGATTATTTATCATGGGCGAAGACGGATCAGAGCAGATTGTACTGAGAGTGCACCA  | <i>AfCHOA</i> and <i>AfBADA</i> disruption cassette |      |
| 35- <i>CHOABADA</i>               | TGGTGCACTCTCAGTACAATCTGCTCTGATCCGTCTTCGCCATGATAAATAATCCATAA   | <i>AfCHOA</i> and <i>AfBADA</i> disruption cassette |      |
| 33- <i>CHOABADA</i>               | GGAAGCTCCAAGTCAGTCAAATGATCACA                                 | <i>AfCHOA</i> and <i>AfBADA</i> disruption cassette |      |
| <i>CHOA</i> -KL1-F                | GGCTGTGTCATTGCTAGTCG                                          | RT-PCR                                              |      |
| <i>CHOA</i> -KL1-R                | AGCCTGCACCCAGTCCTT                                            | RT-PCR                                              |      |
| <i>BADA</i> -KL2-F                | CCACTAGCGGAAATCCATGT                                          | RT-PCR                                              |      |
| <i>BADA</i> -KL2-R                | TGAAATCTACCGGAAGCTG                                           | RT-PCR                                              |      |
| EF1a-F                            | CCATGTGTGTCGAGTCCTTC                                          | RT-PCR                                              |      |
| EF1a-R                            | GAACGTACAGCAACAGTCTGG                                         | RT-PCR                                              |      |
| <i>Nde</i> I-PCR1-transcript-F    | GGGAATTCATATGTTACTTGTACAGCTCGTCCATGCCGAG                      | Transcriptional fusion                              | PCR1 |
| PCR1-transcript-R                 | AATCATATAACATTCCATTCTATCACTATCATTGACATGGTGAGCAAGGGCGAGGAGCT   | Transcriptional fusion                              | PCR1 |
| PCR2-transcript-F                 | AGCTCCTCGCCCTTGCTCACCATGTCGAATGATAGTGATAGAATGGAATGTTATGATGATT | Transcriptional fusion                              | PCR2 |
| PCR2-transcript-R                 | CTTAATCAGCTCTTCGCCCTTAGACACCATCTCTTTCAGCTTGAAGGGGCCCC         | Transcriptional fusion                              | PCR2 |
| PCR3-transcript-F                 | GGGGCCCCCTCAAGCTGAAAGAGAATGGTGTCTAAGGGCGAAGAGCTGATTAAG        | Transcriptional fusion                              | PCR3 |
| PCR3-transcript- <i>Nde</i> I-R   | GGGAATTCATATGTTACTTGTACAGCTCGTCCATGCCATTAAGTT                 | Transcriptional fusion                              | PCR3 |
| <i>Nde</i> I-PCR1-translational-F | GGGAATTCATATGTTACTTGTACAGCTCGTCCATGCCGAG                      | Translational fusion                                | PCR1 |

|                           |                                                            |                           |                    |                                            |      |
|---------------------------|------------------------------------------------------------|---------------------------|--------------------|--------------------------------------------|------|
| PCR1-translational-R      | GGA                                                        | CTCGGGAACAGCCCAAGCTGATGGT | GAGCAAGGGCGAGGAGCT | Translational fusion                       | PCR1 |
| PCR2-translational-F      | AGCTCCTCGCCCTTGCTCACCATCAGCTTGGGCTGTTCCCGAGTCC             |                           |                    | Translational fusion                       | PCR2 |
| PCR2-translational-R      | CTTAATCAGCTCTTCGCCCTTAGACACCATCAATTTTGAAAGACAGTAGCAACCCGT  |                           |                    | Translational fusion                       | PCR2 |
| PCR3-translational-F      | ACGGGTTGCTACTGTCTTTGCAAAATTGATGGTGTCTAAGGGCGAAGAGCTGATTAAG |                           |                    | Translational fusion                       | PCR3 |
| PCR3-translational-NdeI-R | GGGAATCCATATGTTACTTGTACAGCTCGTCCATGCCATTAAGTT              |                           |                    | Translational fusion                       | PCR3 |
| NdeI-ATG- <i>AfCHOA</i>   | GGGAATCCATATGGCCACCACAAACGATTTCC                           |                           |                    | Production of recombinant <i>AfChoAp</i>   |      |
| <i>AfCHOA</i> -stop-BamHI | CGCGGATCCCTACAGCTTGGGCTGTTCCCG                             |                           |                    | Production of recombinant <i>AfChoAp</i>   |      |
| NdeI-ATG- <i>AfBADA</i>   | GGGAATCCATATGGCGGACCTACCTTTGCTC                            |                           |                    | Production of recombinant <i>AfBadAp</i>   |      |
| <i>AfBADA</i> -stop-BamHI | CGCGGATCCCTACAATTTTGAAAGACAGTAGCAACCC                      |                           |                    | Production of recombinant <i>AfBadAp</i>   |      |
| CHOA forward              | GCTATGACGCCGCAACCATC                                       |                           |                    | Expression in vivo                         |      |
| CHOA reverse              | CACGCTTAATCCAATCCTTGAAC                                    |                           |                    | Expression in vivo                         |      |
| BADA forward              | CTTCGGACCCTTGAGTTCTGC                                      |                           |                    | Expression in vivo                         |      |
| BADA reverse              | GCCATAGAGGAGCGTTGCC                                        |                           |                    | Expression in vivo                         |      |
| GEL4 forward              | ATACGCCACCGAGCAGGAC                                        |                           |                    | Expression in vivo                         |      |
| GEL4 reverse              | GGAAGAATCACCGCACCCTC                                       |                           |                    | Expression in vivo                         |      |
| GAPDH forward             | CCACTCACGGCAAATTCAAC                                       |                           |                    | Expression in vivo                         |      |
| GAPDH reverse             | GTAGACTCCACGACATACTCA                                      |                           |                    | Expression in vivo                         |      |
| TPS1 forward              | CACCCAAAACGAGGCGAGAC                                       |                           |                    | Expression of trehalose metabolism enzymes |      |
| TPS1 reverse              | GCCACTAAGACCGCTGACC                                        |                           |                    | Expression of trehalose metabolism enzymes |      |
| TPS2 forward              | ACCAATGCCTCAAATGCCACTC                                     |                           |                    | Expression of trehalose metabolism enzymes |      |
| TPS2reverse               | GGTAGAGCGGTATCGGAGACG                                      |                           |                    | Expression of trehalose metabolism enzymes |      |
| TPS3forward               | TGACGCCAGCACCCAATG                                         |                           |                    | Expression of trehalose metabolism enzymes |      |
| TPS3reverse               | CAGCCTTTGTGATGTCCGATGTG                                    |                           |                    | Expression of trehalose metabolism enzymes |      |
| TSL1forward               | CGCCAGAGACGCCACAATAAG                                      |                           |                    | Expression of trehalose metabolism enzymes |      |
| TSL1reverse               | CCGCTGACCGAGAGACATACG                                      |                           |                    | Expression of trehalose metabolism enzymes |      |
| CLOCK9forward             | CGGATGTGTTGGACGGGATTAAC                                    |                           |                    | Expression of trehalose metabolism enzymes |      |
| CLOCK9reverse             | TGGCACCACTTATTGAACAGTCG                                    |                           |                    | Expression of trehalose metabolism enzymes |      |
| M1PDHforward              | GAAGAGGGCGAGAAAACCAAGAC                                    |                           |                    | Expression of mannitol metabolism enzymes  |      |
| M1PDHreverse              | CGACGGCACAAGTGACAACG                                       |                           |                    | Expression of mannitol metabolism enzymes  |      |
| M2DHforward               | GGGTAAACGACTACGCCATTTGC                                    |                           |                    | Expression of mannitol metabolism enzymes  |      |
| M2DHreverse               | AGGAGTTGATGCTGCCGATGAC                                     |                           |                    | Expression of mannitol metabolism enzymes  |      |

## Supplementary figures

**Fig S1.** (A) Purification of recombinant *AfCodAp* and *AfBadAp* heterologously expressed in *E. coli* Rosetta (DE3)pLysS as analyzed by SDS-PAGE . Lane 1: cell free extract. Lane 2: after 65% ammonium sulfate precipitation and dialysis. Lane 3: after DEAE-Sepharose column chromatography. Lane 4: purified choline oxidase. Lane 5: Molecular mass markers: choline oxidase from *A. globiformis* (60 kDa) and nitronate monooxygenase from *Neurospora crassa* (40 kDa). Lane 6; BADA cell free extract. Lane 7 purified BADA. (B) UV-visible absorbance spectra of choline oxidase in 100 mM imidazole, pH 7.0, containing 10% glycerol. Oxidized enzyme (thick line) reduced enzyme (dotted line) after anaerobic substrate reduction with choline. (C) . Determination of betaine aldehyde produced during catalytic turnover of *AfChoAp* with choline as substrate. *AfChoAp* at a concentration of 0.5  $\mu$ M was incubated with saturating choline (50 mM) and 1.1 mM oxygen in 20 mM Tris-Cl at 25 °C. At the indicated times, aliquots of the reaction mixture were withdrawn and the concentration of betaine aldehyde was determined colorimetrically using 2,4-dinitrophenylhydrazine as dye. (●) Experimental data; (○) expected values based on the kinetic parameters of the enzyme if all the betaine aldehyde produced under the experimental conditions used accumulates in the reaction mixture without being further oxidized to GB.

**Fig. S2.** A. Deletion of *AfCHOA* gene by targeted gene replacement using the *HPH* gene. Restriction maps of genomic fragments containing the *AfCHOA* wild-type (A1), the *AfchoA $\Delta$ ::HPH* deletion allele (A2). The black boxes indicate the *AfCHOA* 5'- and 3'-flanking sequences used for homologous recombination. (A3) Southern hybridization of *AfCHOA* wild-type strain (*akuB<sub>ku80</sub>*) and deletion mutant strain (*AfchoA $\Delta$ ::HPH*). Genomic DNA of each strain was digested with *EcoRI* or *NcoI* and hybridized and probed with RBDNA fragments. B. Deletion of *AfBADA* gene by targeted gene replacement using the *HPH* gene. Restriction maps of genomic fragments containing the *AfBADA* wild-type (B1), the *AfbadA $\Delta$ ::HPH* deletion allele (B2). Southern hybridization of *AfBADA* wild-type strain (*akuB<sub>ku80</sub>*) and deletion mutant strain (*AfbadA $\Delta$ ::HPH*). Genomic DNA of each strain was digested with *NcoI* or *HindIII* hybridized and probed with LB DNA fragments (B3). C. Deletion of *AfCHOA* and *AfBADA* gene cluster by targeted gene replacement using the *HPH* gene. Restriction maps of genomic fragments containing the *AfCHOA* and *AfBADA* wild-type (C1), the *AfchoA $\Delta$ AfbadA $\Delta$ ::HPH* deletion allele (C2). The black boxes indicate the *AfCHOA* and *AfBADA* cluster 5'- and 3'-flanking sequences used for homologous recombination. (C3) Southern hybridization of *AfCHOA* and *AfBADA* wild-type strain (*akuB<sub>ku80</sub>*) and deletion mutant strain (*AfchoA $\Delta$ AfbadA $\Delta$ ::HPH*). Genomic DNA of each strain was digested with *NcoI* or *EcoRI* hybridized and probed with LB and RB DNA fragments, respectively. (C4) Construction of translational fusion proteins. Translational fusion was performed by fusion of three PCR fragments: the PCR1 fragment encoding for eGFP, the PCR2 fragment containing the *AfCHOA* ORF, the intergenic region (1.650 kb) of the *AfCHOA* and *AfBADA* genes and the *AfBADA* ORF and the PCR3 fragment encoding for RFP-T. This construction was used for the complementation of the double mutant *AfchoA $\Delta$ AfbadA $\Delta$ ::HPH*. LB (Left border flanking 5' sequences of the target gene), RB (Right border flanking 3' sequences of the target gene) used for homologous recombination.

**Fig. S3.** A. Use of choline as a carbon source. The *akuBku80* parental and the *AfchoAΔ::HPH*, *AfbadAΔ::HPH* and *AfchoAΔAfbadAΔ::HPH* mutants were grown on agar plates with MM without carbon source, MM with choline chloride (100 mM) or with GB (100 mM) as sole carbon source. B. Use of choline as both carbon and nitrogen sources.

**Fig.S4.** <sup>1</sup>H, <sup>13</sup>C-HSQC (upper spectrum; CH<sub>1</sub> and CH<sub>3</sub> peaks plotted in blue, CH<sub>2</sub> peaks plotted in red) and <sup>1</sup>H, <sup>13</sup>C-HMBC (lower spectrum) of the intracellular fraction from *A. fumigatus akuBku80* strain cultured in MM (right panel) and that from *A. fumigatus AfchoAΔ::HPH* strain (left panel). GB signals are circled in green. Two signals ( $\delta_H/\delta_C=3.219/56.06$  for NCH<sub>3</sub> and 3.857/68.83 ppm for CH<sub>2</sub>) in the <sup>1</sup>H,<sup>13</sup>C-HSQC spectrum and <sup>1</sup>H-<sup>13</sup>C long range correlations between NCH<sub>3</sub> proton and CH<sub>2</sub> carbon ( $\delta_H/\delta_C=3.219/68.83$  ppm), CH<sub>2</sub> proton and NCH<sub>3</sub> carbon ( $\delta_H/\delta_C=3.857/56.06$  ppm), and CH<sub>2</sub> proton and CO carbon ( $\delta_H/\delta_C=3.857/171.97$  ppm) in the <sup>1</sup>H,<sup>13</sup>C-HMBC spectrum were identified in the intracellular fraction of *A. fumigatus akuBku80* strain corresponding to those of the GB standard, but not in that of *A. fumigatus AfchoAΔ::HPH* strain.

**Fig. S5.** Analysis of *akuBku80*;  $\Delta choA$ ,  $\Delta badA$  and  $\Delta choA/\Delta badA$  strains under an osmotic shock. (A) Note the absence of growth differences between the parental strain and the mutants when grown in MM medium containing 0, 0.6 or 1.2 M of NaCl (B). RT-PCR data showing the lack of difference in the expression of *BADA* and *CHOA* genes in mycelium of *akuBku80*;  $\Delta badA$ ,  $\Delta choA$  and  $\Delta choA/\Delta badA$  strains grown for 16 hrs in Sabouraud medium with 0 or 0.6 M NaCl. *Gel4* gene was used as a control of constitutive expression.

**Fig. S6** Kinetics of the concentrations of trehalose and polyols during the conidial germination of *A. fumigatus*. Concentrations are expressed in  $\mu\text{g}/2.5 \times 10^7$  conidia

**Fig. S7.** Expression of trehalose and mannitol biosynthesis enzymes during conidial germination determined by RT-PCR in *akuBku80* and *AfchoAΔAfbadAΔ::HPH* mutant in resting conidia (0 h) and germinated conidia incubated in YPD broth at 37 °C for 3 h. Specific primer pairs designed to include an intron in the PCR product to verify the lack of genomic DNA amplification (Table S2) were used for cDNA amplification. The sizes of amplified products are indicated. *EF1α* gene (TEF) was constitutively expressed and used as a control of constitutive expression. Genes tested: trehalose phosphate synthase/phosphatase complex (*TPS1*, *TPS2*, *TPS3*, *TS11*); *CLOCK9* enzyme; Mannitol 1 phosphate 5 dehydrogenase (*MIPDH*) and Mannitol2 dehydrogenase (*M2DH*).

**Fig. S8** A. Expression of *CHOA* and *BADA* in the lung of mice infected by *A. fumigatus*. *GEL4* was used as a fungal positive control gene. Lungs from immune-suppressed non infected mice (lanes 5, 6, 7 and 8) were used as a negative control for fungal genes but as a positive control for the mouse gene *GAPDH*. B. Growth of the *AfchoAΔ::HPH*, *AfbadAΔ::HPH* and *AfchoAΔAfbadAΔ::HPH* mutants is not ore affected in the lung of immunocompetent mice than the parental strain. CFUs of conidia in BALs 36 hours after inoculation to mice.

Fig. S1

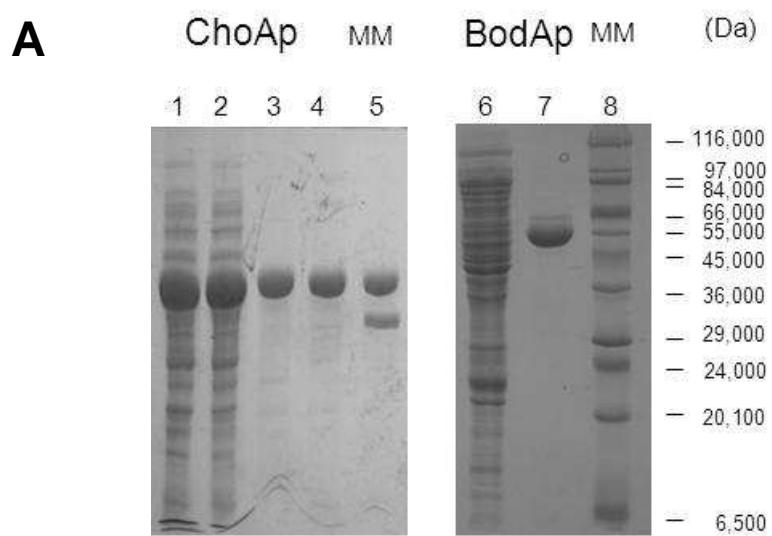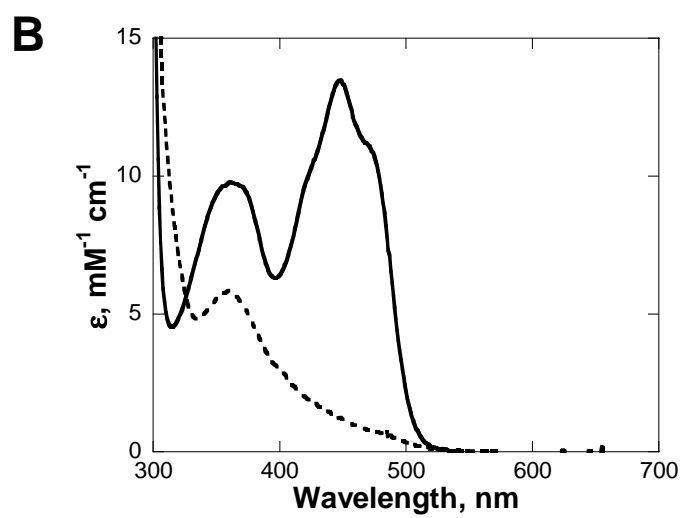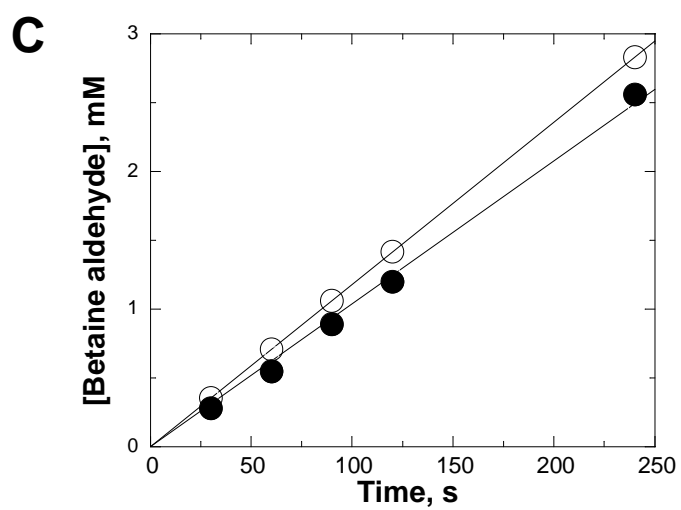

Fig. S2

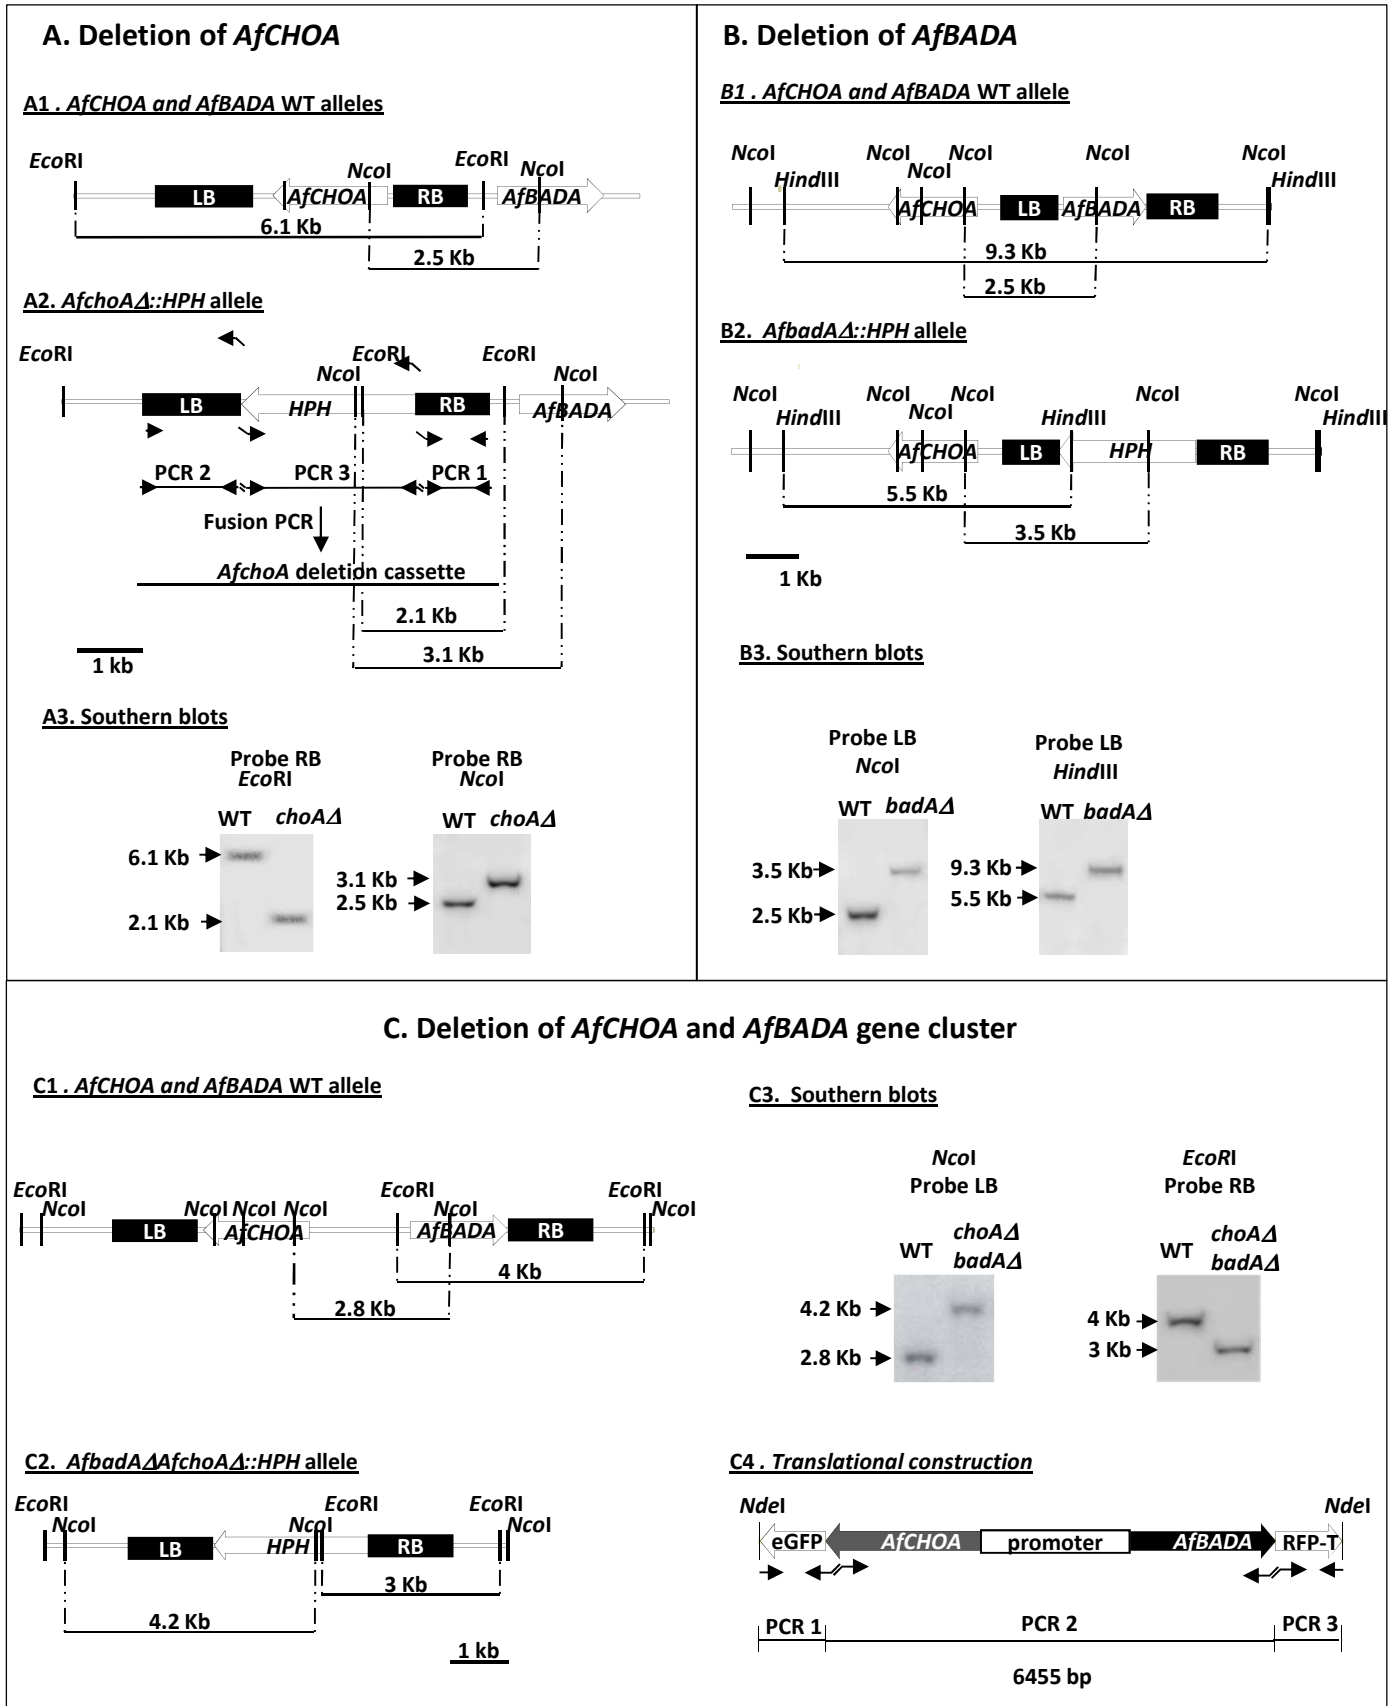



Fig. S3

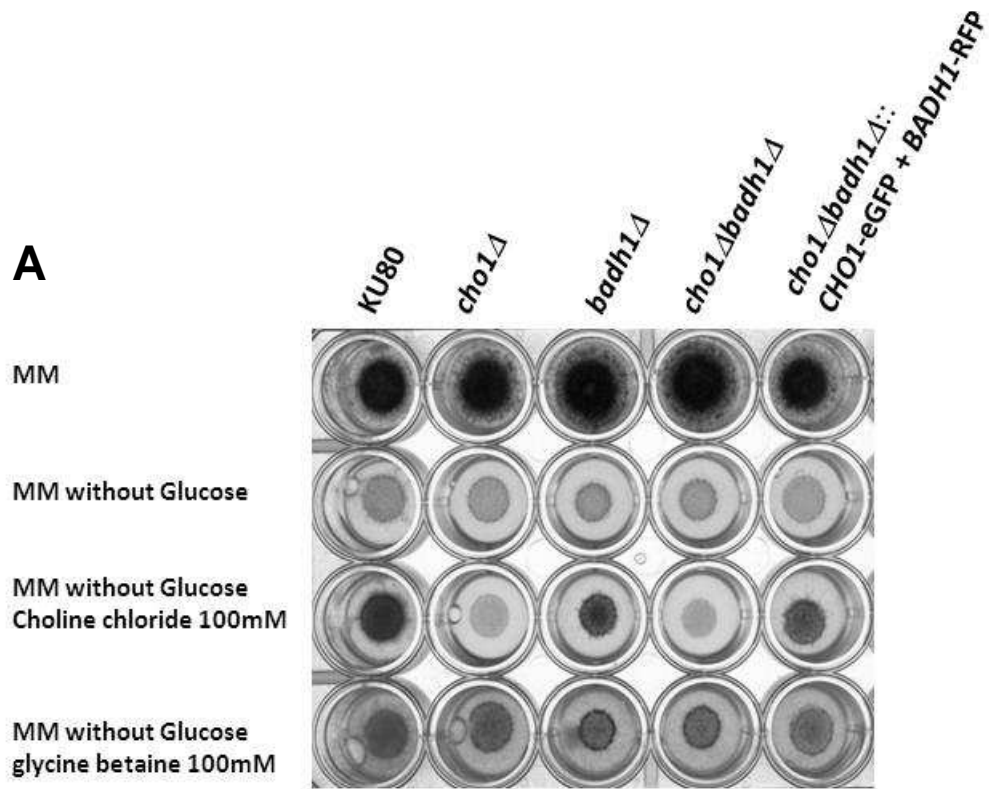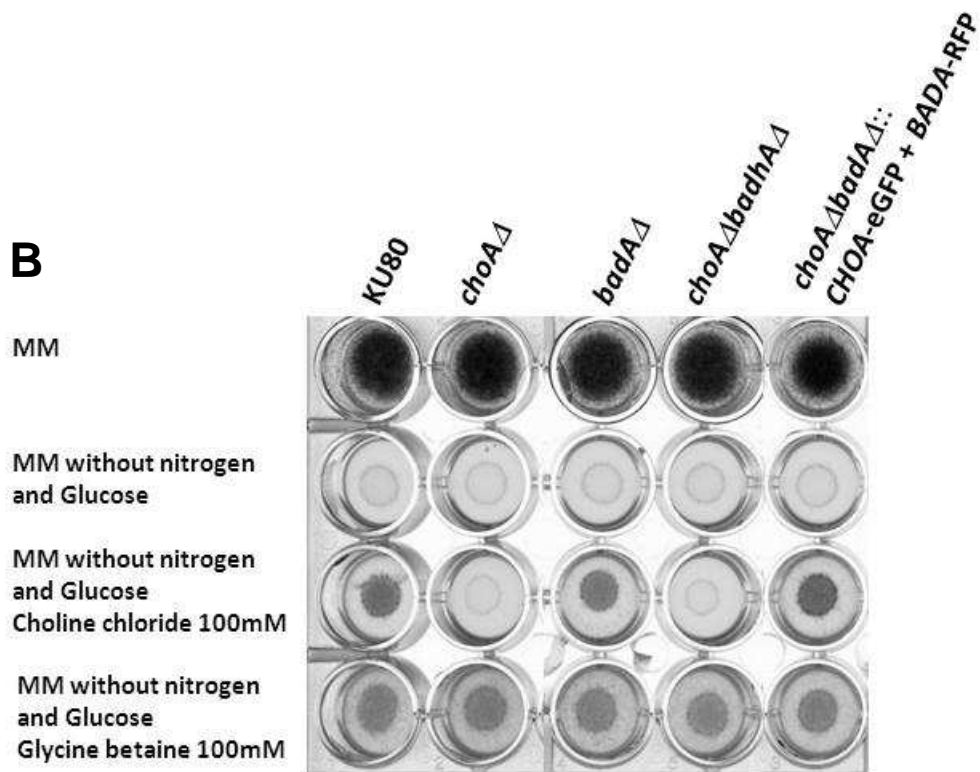

Fig. S4

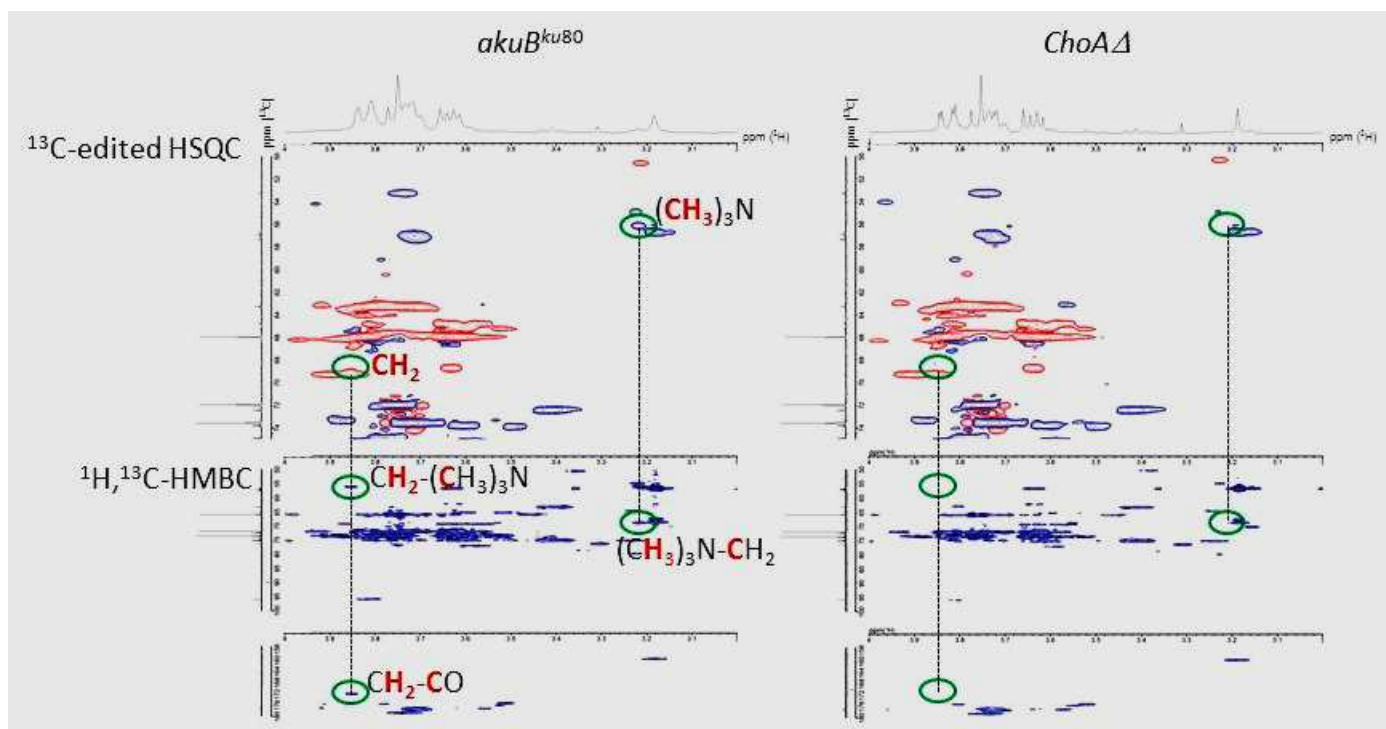

Fig. S5

(A) NaCl

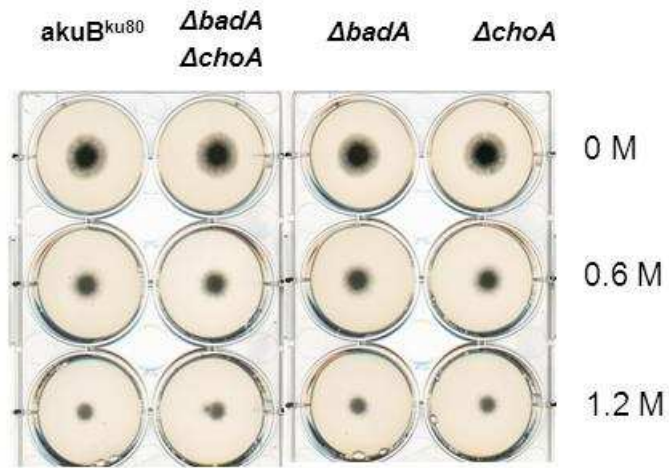

(B) RT-PCR

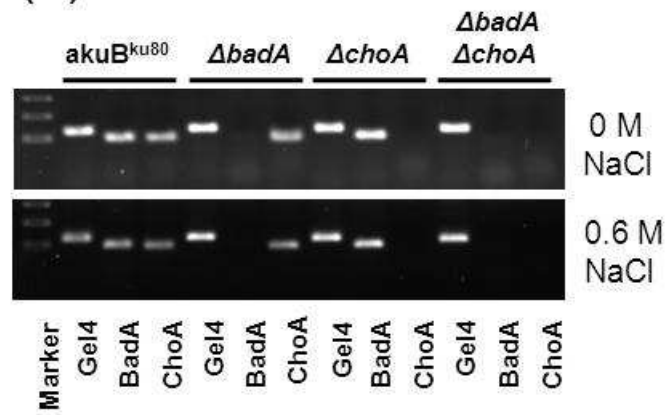

Fig. S6

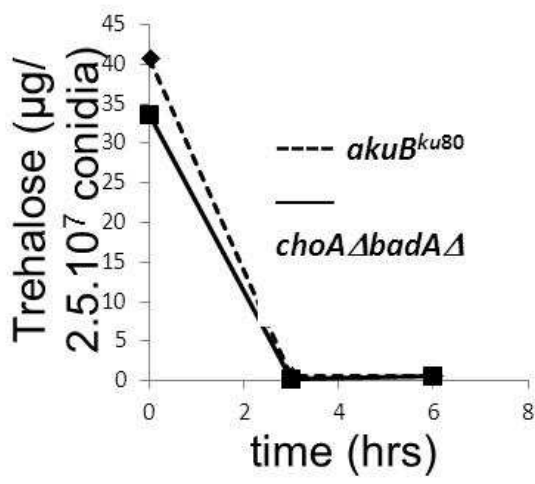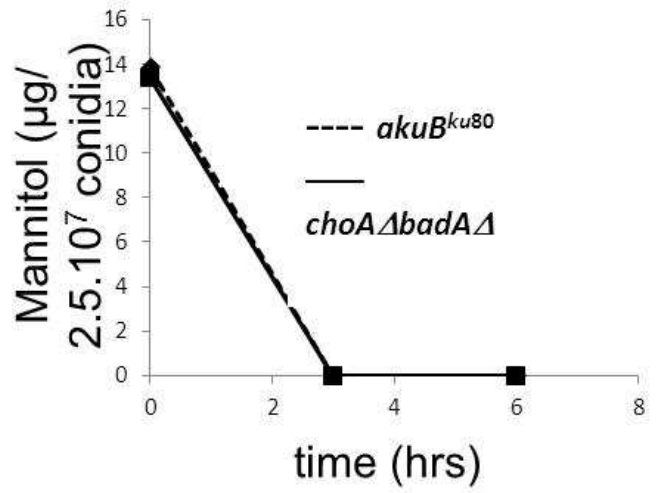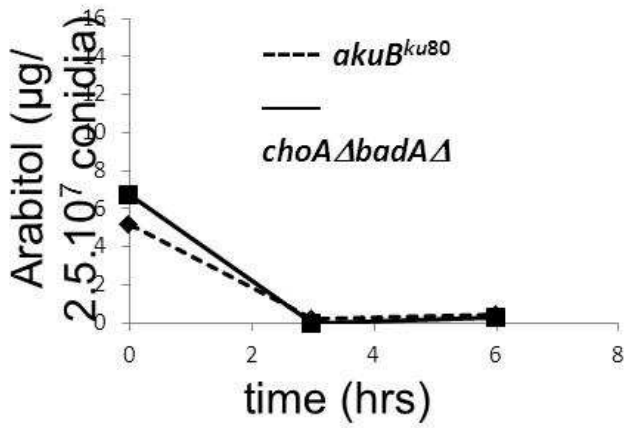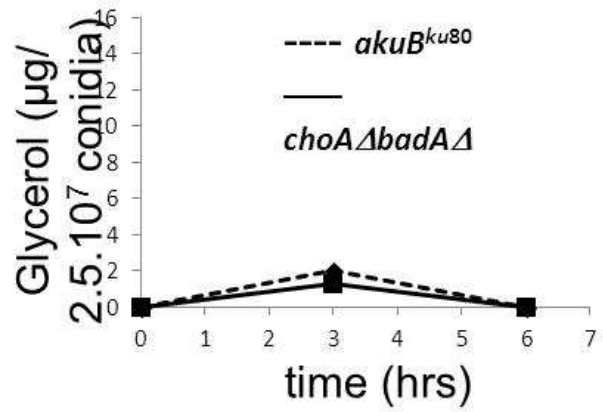

Fig. S7

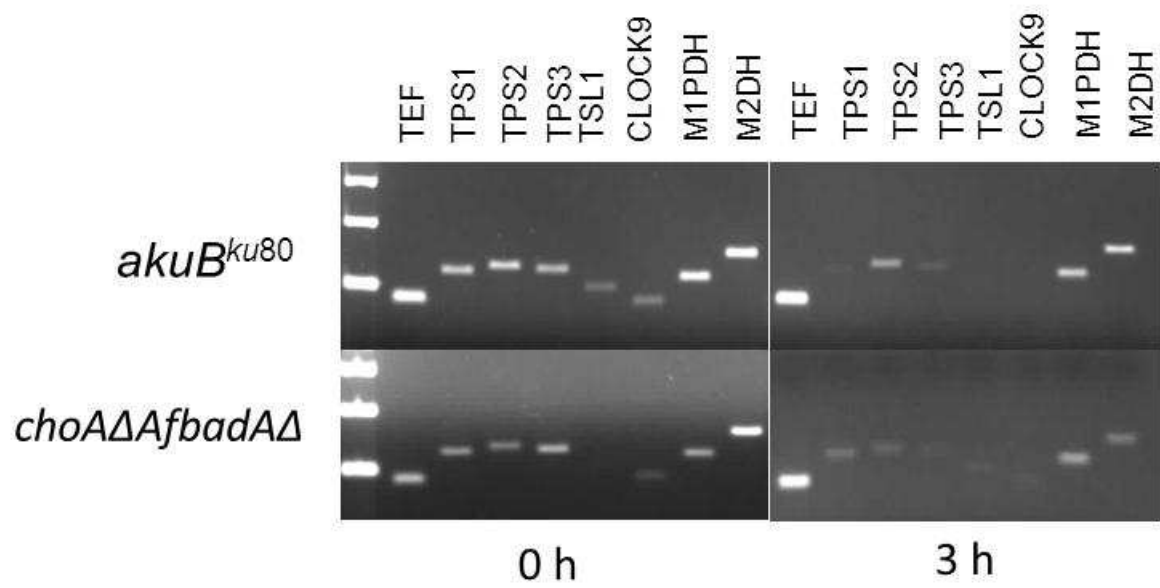

Fig. S8

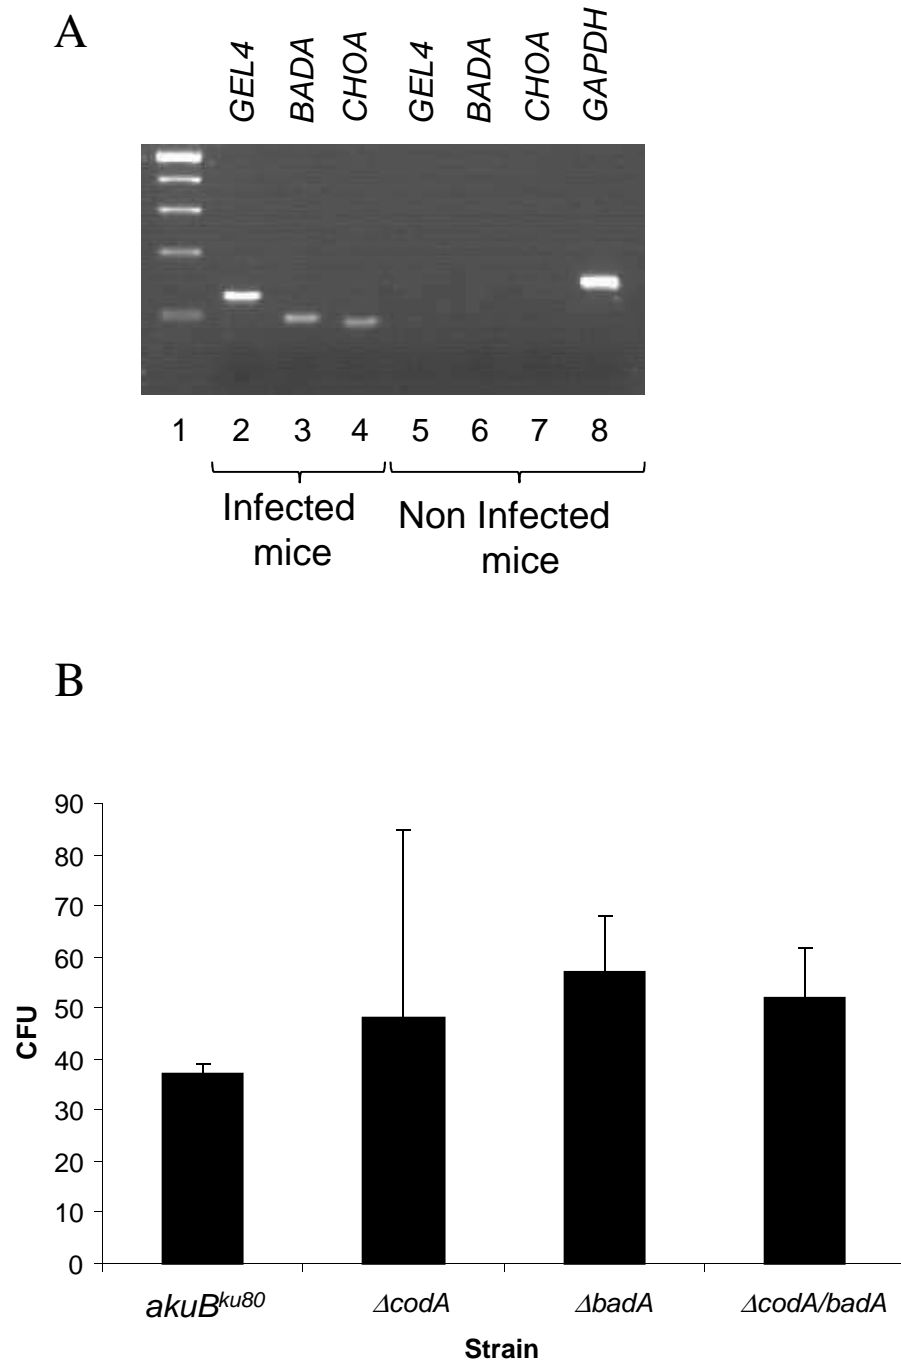

Supplement: EC.00348-12_zek999094106so1.pdf [file EC.00348-12_zek999094106so1.pdf]
